# Supplementary material
Source: Springer Nature journal article supplement (https://www.springermedizin.de/resource/supplementary/12936_2011_2077_MOESM9_ESM.pdf/9543396)

A

MSP1

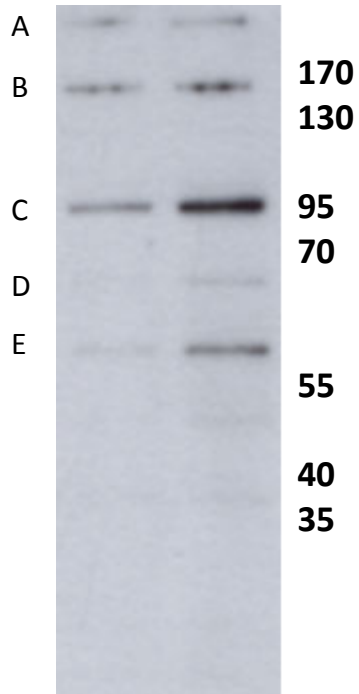

DMSO KN-62  
(200 μM)

Actin

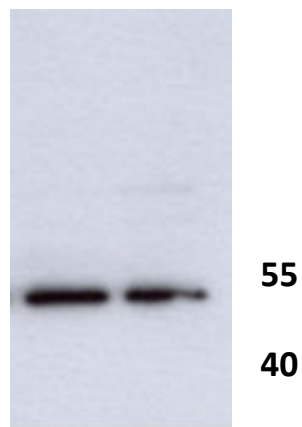

DMSO KN-62  
(200 μM)

B

Densitometry  
MSP- *P. berghei*

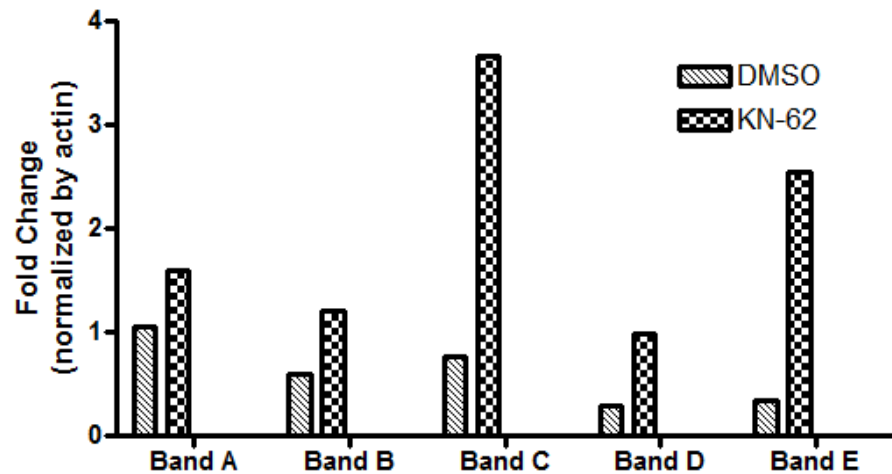

Supplement: MOESM9 [file 9543396]
